# Supplementary material for: Transcriptomic Sequencing of Airway Epithelial Cell NCI-H292 Induced by Synthetic Cationic Polypeptides
Source: Biomed Res Int. 2019 Apr 1;2019:3638469. doi: 10.1155/2019/3638469 (PMC6463615; doi:10.1155/2019/3638469)
Supplement: Supplementary Materials — Supplemental Excel 1 shows a total of 230 differentially expressed genes of which 86 were upregulated and 144 were downregulated. Table S1 lists upregulated KEGG pathways. Table S2 shows downregulated KEGG pathways. [file 3638469.f1.zip]

Archive with 4 entries (3 files):
- 3638469.f1/
- 3638469.f1/Supplemental Excel 1.xlsx
- 3638469.f1/Table S1.xls
- 3638469.f1/Table S2.xls
