# Supplementary material for: Transcriptomic Sequencing of Airway Epithelial Cell NCI-H292 Induced by Synthetic Cationic Polypeptides
Source: Biomed Res Int. 2019 Apr 1;2019:3638469. doi: 10.1155/2019/3638469 (PMC6463615; doi:10.1155/2019/3638469)
Supplement: Supplementary Materials — Supplemental Excel 1 shows a total of 230 differentially expressed genes of which 86 were upregulated and 144 were downregulated. Table S1 lists upregulated KEGG pathways. Table S2 shows downregulated KEGG pathways. [file 3638469.f1.zip › 3638469.f1/Supplemental Excel 1.xlsx]

## Sheet: up_PLA_vs_C
#log2FC >= 0.585 #p-value cut-off <= 0.05 #q-value cut-off <= 1.00 #Gene biotype: protein_coding #Condition pair: up_PLA_vs_C Column A: Track_id, The database name in gene level. Column B: Gene_Name, The name of gene. Column C: Locus, The genomic coordinates of gene. Column D: Strand, Strand of the gene. Column E: Gene_Type, The biological type of gene. Column F: log2FC, if the comparison is test…
Annotation					DE Statistic				FPKM
Track_id	Gene_Name	Locus	Strand	Gene_Type	log2FC	Fold_Change	p_value	q_value	PLA_FPKM	C_FPKM	C1	C2	C3	PLA1	PLA2	PLA3
ENSG00000241945.7_1	PWP2	chr21:45527171-45551063	+	protein_coding	2.15423	4.45132	6.27223e-05	0.118051	2.45539	0.301162	0.228837	0.197061	0.271645	3.91511	5.4623	4.19423
ENSG00000197632.8_2	SERPINB2	chr18:61538926-61571124	+	protein_coding	1.72782	3.31228	0.0354575	0.341052	2.06797	0.340147	0.232263	0.282987	0.283093	1.49108	7.85677	2.34119
ENSG00000134363.11_1	FST	chr5:52776239-52782964	+	protein_coding	1.67217	3.18693	0.0100703	0.264968	2.07075	0.398583	0.227726	0.245876	0.497543	2.64753	5.75673	2.00842
ENSG00000178974.9_2	FBXO34	chr14:55738021-55828636	+	protein_coding	1.58898	3.00837	0.0152873	0.287561	2.54147	0.952488	0.99947	1.15799	0.679645	3.34072	3.64329	8.79016
ENSG00000137440.4_1	FGFBP1	chr4:15937192-15940363	-	protein_coding	1.54475	2.91753	0.00259032	0.232372	3.17619	1.63144	1.3711	2.64057	2.44522	7.56321	9.70304	7.05824
ENSG00000176624.10_1	MEX3C	chr18:48700920-48744674	-	protein_coding	1.5254	2.87866	0.00125028	0.21415	2.6837	1.15831	0.725529	1.52886	1.54804	5.2212	5.65947	5.40195
ENSG00000175832.12_2	ETV4	chr17:41605212-41656988	-	protein_coding	1.49737	2.82328	0.0162549	0.289004	2.40631	0.90894	1.05096	0.751361	0.842987	5.16153	6.51091	2.2191
ENSG00000144063.3_1	MALL	chr2:110841447-110874143	-	protein_coding	1.48482	2.79883	0.0123023	0.272502	3.20532	1.7205	2.58588	2.5998	1.77262	9.77145	11.2178	4.96248
ENSG00000244405.7_2	ETV5	chr3:185764097-185828107	-	protein_coding	1.38641	2.61427	0.0162621	0.289004	1.93334	0.546934	0.618613	0.413239	0.363238	3.84651	3.81674	1.38671
ENSG00000168461.12_2	RAB31	chr18:9708162-9862548	+	protein_coding	1.32138	2.49905	0.0252883	0.317626	2.85096	1.52958	3.01742	1.54668	1.35193	9.57975	5.70942	4.29067
ENSG00000146072.6_1	TNFRSF21	chr6:47199268-47277641	-	protein_coding	1.18894	2.27985	0.0333741	0.334536	3.64355	2.45461	6.45043	4.19447	3.25613	13.4166	15.0886	7.41541
ENSG00000112972.14_2	HMGCS1	chr5:43289497-43313614	-	protein_coding	1.0863	2.12329	0.00108006	0.21415	5.44601	4.35972	17.4366	21.2054	20.1386	42.5293	37.6599	48.2264
ENSG00000189057.10_2	FAM111B	chr11:58874658-58894883	+	protein_coding	1.08531	2.12183	0.00157493	0.215598	5.23013	4.14482	19.6919	14.9028	15.8216	32.6034	39.709	37.6545
ENSG00000214736.7_2	TOMM6	chr6:41755400-41757636	+	protein_coding	1.03212	2.04502	0.0238142	0.313713	4.1052	3.07308	8.0457	5.74577	8.76783	17.1253	21.3193	11.6009
ENSG00000205420.10_1	KRT6A	chr12:52880958-52887041	-	protein_coding	1.01992	2.0278	0.0255849	0.318827	1.92521	0.905289	1.10317	0.383719	1.25754	2.66206	3.87472	2.06874
ENSG00000135318.11_2	NT5E	chr6:86159302-86205509	+	protein_coding	0.99078	1.98726	0.0182758	0.298458	6.13845	5.14767	29.7848	33.4502	41.0035	68.5151	91.4808	53.3809
ENSG00000147536.11_1	GINS4	chr8:41386725-41402565	+	protein_coding	0.98715	1.98226	0.0102638	0.264968	2.48372	1.49657	1.86621	1.76198	1.83801	5.02981	5.91952	3.19418
ENSG00000110092.3_1	CCND1	chr11:69455855-69469242	+	protein_coding	0.952548	1.93529	0.0224446	0.31342	6.63012	5.67757	55.7213	50.2535	45.12	89.4553	137.298	76.6862
ENSG00000198417.6_1	MT1F	chr16:56691606-56694610	+	protein_coding	0.935619	1.91271	0.0150533	0.286411	3.83777	2.90215	4.94435	6.90381	7.89129	12.8049	11.1722	16.3961
ENSG00000023330.14_1	ALAS1	chr3:52232102-52248343	+	protein_coding	0.927248	1.90164	0.00908772	0.261005	3.29329	2.36604	3.11864	4.33094	5.24006	8.55462	10.02	7.94825
ENSG00000109133.12_1	TMEM33	chr4:41937137-41962589	+	protein_coding	0.923115	1.8962	0.0455209	0.359162	3.53476	2.61165	4.73479	8.21068	3.32259	9.90145	10.7437	11.1596
ENSG00000116285.12_1	ERRFI1	chr1:8064464-8086368	-	protein_coding	0.921445	1.89401	0.0313283	0.333622	2.27091	1.34947	1.88716	1.20049	1.60436	4.47966	5.06117	2.38477
ENSG00000181649.5_1	PHLDA2	chr11:2949503-2950685	-	protein_coding	0.91775	1.88917	0.0363807	0.342311	3.75996	2.84221	7.91614	6.62962	4.4211	13.4718	15.6998	9.28833
ENSG00000075213.10_2	SEMA3A	chr7:83585093-84122040	-	protein_coding	0.902978	1.86992	0.00847241	0.257155	1.46368	0.560699	0.581461	0.389336	0.460481	1.86533	2.34591	1.18848
ENSG00000183742.12_2	MACC1	chr7:20174278-20257027	-	protein_coding	0.898717	1.86441	0.0297525	0.332215	2.05363	1.15492	0.999221	1.0188	1.73553	2.29493	4.61336	2.86854
ENSG00000120437.8_1	ACAT2	chr6:160181360-160200087	+	protein_coding	0.887149	1.84952	0.0104315	0.264968	5.20061	4.31346	15.006	19.6965	22.7281	33.9767	32.6438	41.2604
ENSG00000069482.6_1	GAL	chr11:68451247-68458643	+	protein_coding	0.885104	1.8469	0.00171826	0.215598	5.24483	4.35972	18.0022	17.8954	23.1026	35.9298	38.2189	36.6425
ENSG00000134758.13_2	RNF138	chr18:29671818-29711524	+	protein_coding	0.877399	1.83706	0.0328837	0.334096	3.62025	2.74285	4.93211	6.37344	5.85738	12.8968	7.64464	14.4791
ENSG00000073464.11_2	CLCN4	chrX:10124985-10205700	+	protein_coding	0.864845	1.82114	0.0240351	0.314419	1.88137	1.01652	0.93975	1.41992	0.763851	2.60961	3.74974	1.91683
ENSG00000182585.9_1	EPGN	chr4:75174190-75181024	+	protein_coding	0.835846	1.7849	0.00352234	0.247147	1.40906	0.573213	0.539292	0.678371	0.274834	1.73041	1.83313	1.4211
ENSG00000104549.11_1	SQLE	chr8:126010739-126034525	+	protein_coding	0.832309	1.78053	0.0143689	0.283644	5.40372	4.57141	18.9461	26.3173	23.6658	34.1836	41.7515	49.4369
ENSG00000147676.13_1	MAL2	chr8:120177273-120257913	+	protein_coding	0.821945	1.76779	0.000306706	0.18946	4.9972	4.17525	18.1622	15.4863	17.6664	31.2818	30.0049	31.5485
ENSG00000115758.12_2	ODC1	chr2:10580094-10588630	-	protein_coding	0.818468	1.76353	0.0376892	0.345607	5.82619	5.00772	24.338	31.3257	39.654	43.2369	65.1305	61.429
ENSG00000052802.12_2	MSMO1	chr4:166248775-166264312	+	protein_coding	0.814048	1.75814	0.00482212	0.248099	5.46123	4.64719	23.4107	25.2765	23.529	47.357	35.2934	47.719
ENSG00000176024.17_2	ZNF613	chr19:52430400-52452012	+	protein_coding	0.80871	1.75164	0.0334158	0.334536	1.63952	0.830807	0.584451	0.908417	0.860979	3.11966	1.31846	2.16643
ENSG00000092964.17_2	DPYSL2	chr8:26371538-26515694	+	protein_coding	0.805207	1.7474	0.00221099	0.230175	2.63958	1.83437	2.59003	2.33362	2.78955	5.38694	5.94465	4.45549
ENSG00000067064.10_2	IDI1	chr10:1085848-1095110	-	protein_coding	0.803632	1.74549	0.00264509	0.232372	6.07932	5.27569	34.5412	36.8868	42.172	68.0821	59.2836	73.2352
ENSG00000156239.11_1	N6AMT1	chr21:30244513-30257693	-	protein_coding	0.763792	1.69795	0.0479171	0.364112	1.97868	1.21489	1.28199	1.28769	1.39577	1.72221	3.98093	3.51539
ENSG00000122705.16_1	CLTA	chr9:36190853-36304778	+	protein_coding	0.756832	1.68978	0.00901955	0.261005	5.44116	4.68433	27.9573	24.1652	22.3247	45.6215	47.4695	35.2916
ENSG00000133318.13_2	RTN3	chr11:63448918-63527363	+	protein_coding	0.754189	1.68668	0.0279668	0.329239	4.99069	4.2365	23.4615	17.5169	13.7872	32.1626	27.6064	32.8787
ENSG00000271092.5_2	TMEM56-RWDD3	chr1:95583479-95712781	+	protein_coding	0.743789	1.67457	0.000139932	0.162566	0.743806	1.68192e-05	3.04131e-05	7.60326e-07	3.80163e-06	0.781204	0.571769	0.67734
ENSG00000094804.9_1	CDC6	chr17:38443885-38460909	+	protein_coding	0.717653	1.6445	0.0262347	0.322461	4.35847	3.64081	8.96408	12.2904	13.6557	16.7897	22.9764	19.2365
ENSG00000135069.13_1	PSAT1	chr9:80912059-80945009	+	protein_coding	0.710423	1.63628	0.00403782	0.248099	6.06196	5.35154	34.0742	41.0694	45.1282	63.5775	68.2262	65.7028
ENSG00000164045.11_2	CDC25A	chr3:48198636-48229892	-	protein_coding	0.710298	1.63614	0.029416	0.332215	3.85597	3.14567	6.95814	6.57182	10.503	11.8256	15.2232	13.5906
ENSG00000136155.16_1	SCEL	chr13:78109809-78219398	+	protein_coding	0.707749	1.63325	0.0451262	0.358557	2.3478	1.64005	2.7283	2.17933	1.55426	4.5548	5.0307	2.93765
ENSG00000164080.13_2	RAD54L2	chr3:51575160-51702683	+	protein_coding	0.698282	1.62257	0.0203457	0.306381	2.3089	1.61062	1.83608	1.87636	2.49119	2.98001	4.71457	4.34908
ENSG00000125912.10_2	NCLN	chr19:3185561-3209573	+	protein_coding	0.687227	1.61019	0.0203481	0.306381	4.44073	3.7535	11.434	11.7538	14.4703	23.2015	16.5123	23.1652
ENSG00000103540.16_2	CCP110	chr16:19535133-19564730	+	protein_coding	0.677854	1.59976	0.0231176	0.31342	2.49348	1.81563	3.07236	2.06226	2.49773	3.87014	4.34791	5.85666
ENSG00000001630.15_2	CYP51A1	chr7:91741465-91772266	-	protein_coding	0.675847	1.59753	0.00582913	0.248099	5.67757	5.00172	27.7774	30.6403	35.1172	51.3791	44.9054	54.7617
ENSG00000166033.11_1	HTRA1	chr10:124221041-124274424	+	protein_coding	0.673632	1.59508	0.0108092	0.267215	5.43851	4.76488	25.4582	27.6777	25.4854	48.5212	45.2215	34.6308
ENSG00000182963.9_2	GJC1	chr17:42875816-42908184	-	protein_coding	0.670014	1.59109	0.0371115	0.344147	2.36763	1.69762	1.49937	2.90089	2.5003	4.33872	3.51421	4.70379
ENSG00000101187.15_1	SLCO4A1	chr20:61273797-61317137	+	protein_coding	0.66855	1.58947	0.00969808	0.264743	2.31966	1.65111	1.99581	1.7573	2.75063	4.10634	4.26387	3.62857
ENSG00000075391.16_2	RASAL2	chr1:178063276-178453282	+	protein_coding	0.667365	1.58817	0.0330709	0.334198	3.10686	2.4395	3.62593	5.08613	4.6695	6.38334	9.89216	6.95075
ENSG00000241360.1_2	PDXP	chr22:38054734-38062941	+	protein_coding	0.663997	1.58447	0.00231972	0.232372	2.47729	1.81329	2.33236	2.31057	2.93468	4.41789	4.33377	4.97516
ENSG00000079459.12_2	FDFT1	chr8:11653082-11696818	+	protein_coding	0.66067	1.58082	0.000124494	0.162566	4.35647	3.6958	11.8785	11.4682	12.5508	19.6033	18.7523	20.1216
ENSG00000103187.7_1	COTL1	chr16:84599200-84651683	-	protein_coding	0.65834	1.57827	0.0030567	0.246576	6.13323	5.47489	42.4438	43.9426	44.0535	70.353	77.5672	60.688
ENSG00000169715.14_1	MT1E	chr16:56659387-56661024	+	protein_coding	0.657814	1.57769	0.00942701	0.262856	7.42311	6.7653	112.934	113.541	97.6402	175.105	194.679	145.696
ENSG00000187678.8_2	SPRY4	chr5:141689992-141706020	-	protein_coding	0.652427	1.57181	0.0481047	0.364112	0.781474	0.129047	0.15322	0.0856539	0.0445694	0.726754	1.25506	0.304223
ENSG00000112531.16_1	QKI	chr6:163835032-163999628	+	protein_coding	0.652159	1.57152	0.0401747	0.348556	1.66437	1.01221	0.720144	1.16747	1.20088	1.5065	2.25993	2.8976
ENSG00000050344.8_1	NFE2L3	chr7:26191860-26226745	+	protein_coding	0.651946	1.57129	0.00600876	0.248099	1.74824	1.0963	1.20573	1.09301	1.11705	2.10884	2.96914	2.07273
ENSG00000133935.6_1	C14orf1	chr14:76116134-76127532	-	protein_coding	0.649465	1.56859	0.00546464	0.248099	4.15594	3.50647	10.2771	10.9657	9.87746	18.1413	14.2664	18.3856
ENSG00000166068.12_2	SPRED1	chr15:38544527-38649450	+	protein_coding	0.648733	1.56779	0.0283333	0.332215	2.58361	1.93488	3.13289	2.86757	2.49685	4.8693	6.51319	3.88452
ENSG00000257949.6_2	TEN1	chr17:73975301-73996667	+	protein_coding	0.643808	1.56245	0.0191855	0.303355	1.28833	0.644518	0.567282	0.611657	0.5123	0.938628	1.79941	1.68481
ENSG00000175305.17_2	CCNE2	chr8:95891998-95908906	-	protein_coding	0.643227	1.56182	0.028193	0.331384	3.15601	2.51278	3.76626	5.45991	5.03761	7.55303	9.68916	6.74636
ENSG00000065328.16_1	MCM10	chr10:13203554-13253104	+	protein_coding	0.638484	1.55669	0.0296737	0.332215	3.29922	2.66073	4.38613	5.42944	6.3018	7.11067	10.3617	9.35115
ENSG00000172985.10_1	SH3RF3	chr2:109745804-110262209	+	protein_coding	0.637116	1.55522	0.0439101	0.355802	1.08169	0.444573	0.591548	0.209995	0.308839	1.67621	1.05983	0.71993
ENSG00000125148.6_1	MT2A	chr16:56642111-56643409	+	protein_coding	0.63406	1.55193	0.0239525	0.314259	8.31797	7.68391	213.729	217.907	183.974	326.611	380.916	258.746
ENSG00000171365.15_2	CLCN5	chrX:49687225-49863892	+	protein_coding	0.632164	1.54989	0.00554991	0.248099	1.07579	0.443624	0.401663	0.271056	0.411965	1.20306	0.827401	1.32634
ENSG00000132436.11_2	FIGNL1	chr7:50511826-50610233	-	protein_coding	0.630433	1.54803	0.0150508	0.286411	3.0223	2.39186	3.77899	5.01491	4.02923	6.03715	8.3195	7.1774
ENSG00000197822.10_1	OCLN	chr5:68788119-68853931	+	protein_coding	0.627112	1.54447	0.00970566	0.264743	2.96612	2.339	3.39599	4.64846	4.2161	6.12347	7.67964	6.71751
ENSG00000137463.4_2	MGARP	chr4:140187317-140201492	-	protein_coding	0.62384	1.54097	0.00269299	0.233037	2.49614	1.87229	2.48017	2.69913	2.81198	4.00978	5.02677	4.94746
ENSG00000160570.13_1	DEDD2	chr19:42702750-42724292	-	protein_coding	0.623501	1.54061	0.0114588	0.271417	3.02332	2.39982	3.93662	3.88846	5.09042	6.17125	7.34293	7.98283
ENSG00000243414.5_2	TICAM2	chr5:114914347-114938176	-	protein_coding	0.622141	1.53916	0.0103618	0.264968	1.20272	0.580575	0.291657	0.489889	0.737843	1.42159	1.12618	1.36843
ENSG00000204516.9_2	MICB	chr6:31462658-31478901	+	protein_coding	0.617957	1.5347	0.0233429	0.31342	2.84432	2.22637	2.98923	3.86289	4.28233	5.05379	6.98817	6.65957
ENSG00000154127.9_1	UBASH3B	chr11:122526383-122685181	+	protein_coding	0.617636	1.53436	0.0307052	0.332998	2.84274	2.2251	3.78318	3.45478	3.79648	6.25184	7.91274	4.71198
ENSG00000175768.12_2	TOMM5	chr9:37582643-37592639	-	protein_coding	0.613769	1.53025	0.0195455	0.304032	3.88042	3.26665	8.9262	8.95703	8.01919	17.2597	11.9982	12.4584
ENSG00000187720.14_2	THSD4	chr15:71389291-72075722	+	protein_coding	0.607214	1.52331	0.0114377	0.271417	3.0141	2.40689	4.99421	3.72573	4.2655	7.3069	7.90311	6.12898
ENSG00000132768.13_1	DPH2	chr1:44435672-44439041	+	protein_coding	0.606331	1.52238	0.00843192	0.257155	4.00314	3.39681	10.9293	8.94765	8.84663	13.6794	14.5965	17.0077
ENSG00000115159.15_1	GPD2	chr2:157291802-157470247	+	protein_coding	0.605188	1.52118	0.0120074	0.271999	3.8633	3.25811	8.73634	8.64373	8.32665	14.5629	15.4221	11.0611
ENSG00000182093.14_1	WRB	chr21:40752170-40800454	+	protein_coding	0.604052	1.51998	0.0235097	0.31342	2.18276	1.57871	2.76728	1.66832	1.65127	3.45045	3.70965	3.46518
ENSG00000134809.8_1	TIMM10	chr11:57295936-57298276	-	protein_coding	0.60322	1.5191	0.0138492	0.281413	6.09606	5.49284	43.6328	42.1674	46.3932	68.2672	56.5793	79.2589
ENSG00000173207.12_1	CKS1B	chr1:154947129-154951725	+	protein_coding	0.597801	1.51341	0.0392834	0.348003	5.11032	4.51252	16.707	27.1566	22.8498	32.6655	32.9754	35.0354
ENSG00000169379.15_1	ARL13B	chr3:93698983-93774512	+	protein_coding	0.59396	1.50938	0.0294642	0.332215	2.67685	2.08289	2.53596	3.0589	4.29817	5.33082	5.03826	5.8402
ENSG00000166897.14_2	ELFN2	chr22:37764000-37823505	-	protein_coding	0.592251	1.5076	0.0294539	0.332215	1.90041	1.30816	1.53238	1.53854	1.36198	3.02527	3.39134	1.94342
ENSG00000198858.9_1	R3HDM4	chr19:896503-913245	-	protein_coding	0.590787	1.50607	0.0432682	0.353666	3.4625	2.87171	5.62536	5.20499	8.53813	10.8721	9.25388	10.0036
ENSG00000112640.14_2	PPP2R5D	chr6:42952237-42980080	+	protein_coding	0.58591	1.50099	0.049889	0.364112	4.00817	3.42226	8.18772	12.3934	9.01173	17.0661	16.1653	12.4345

## Sheet: down_PLA_vs_C
#log2FC <= -0.585 #p-value cut-off <= 0.05 #q-value cut-off <= 1.00 #Gene biotype: protein_coding #Condition pair: down_PLA_vs_C Column A: Track_id, The database name in gene level. Column B: Gene_Name, The name of gene. Column C: Locus, The genomic coordinates of gene. Column D: Strand, Strand of the gene. Column E: Gene_Type, The biological type of gene. Column F: log2FC, if the comparison is t…
Annotation					DE Statistic				FPKM
Track_id	Gene_Name	Locus	Strand	Gene_Type	log2FC	Fold_Change	p_value	q_value	PLA_FPKM	C_FPKM	C1	C2	C3	PLA1	PLA2	PLA3
ENSG00000173402.11_2	DAG1	chr3:49506136-49573051	+	protein_coding	-3.1674	0.111305	0.00286521	0.239675	2.62039	5.78779	52.2728	54.2946	56.2413	4.56873	2.63166	10.4971
ENSG00000265590.9_2	AP000275.65	chr21:33951132-33984591	-	protein_coding	-1.93711	0.261139	0.0049554	0.248099	0	1.93711	4.78848	1.5269	2.83913	0	0	0
ENSG00000139112.10_2	GABARAPL1	chr12:10365057-10375729	+	protein_coding	-1.58849	0.332519	0.0356658	0.341833	2.08968	3.67818	16.7917	5.53274	17.0472	4.28538	2.83041	2.80934
ENSG00000173237.4_1	C11orf86	chr11:66742748-66744475	+	protein_coding	-1.50862	0.351448	0.0323228	0.333622	1.10118	2.6098	6.0649	4.72613	4.62231	2.48714	0.183984	1.39138
ENSG00000173227.13_2	SYT12	chr11:66774249-66818334	+	protein_coding	-1.46642	0.361878	0.0104711	0.264968	2.7851	4.25152	18.9855	17.6071	17.5829	7.4632	3.41961	7.75538
ENSG00000164825.3_1	DEFB1	chr8:6728097-6735544	-	protein_coding	-1.46332	0.362657	0.0288087	0.332215	2.72631	4.18964	21.3151	16.6287	14.4454	6.21333	2.89871	9.30502
ENSG00000167705.11_2	RILP	chr17:1549439-1553371	-	protein_coding	-1.42455	0.372534	0.0100708	0.264968	1.09877	2.52333	5.25686	4.6415	4.38322	1.54181	0.409688	1.74174
ENSG00000142178.7_1	SIK1	chr21:44834395-44847008	-	protein_coding	-1.324	0.399426	0.00706933	0.251642	6.20698	7.53098	184.678	192.915	174.702	100.064	53.5056	72.1848
ENSG00000144476.5_2	ACKR3	chr2:237476430-237491001	+	protein_coding	-1.25992	0.417566	0.0392104	0.347983	0.97536	2.23528	2.86922	7.2683	2.26304	1.15047	0.870895	0.889102
ENSG00000064205.10_1	WISP2	chr20:43343485-43357150	+	protein_coding	-1.22871	0.4267	0.0301009	0.332215	1.28927	2.51798	4.95027	5.49157	3.86492	1.63225	0.550849	2.57629
ENSG00000185630.18_2	PBX1	chr1:164524821-164868533	+	protein_coding	-1.22036	0.429175	0.0312921	0.333622	1.75675	2.97711	8.35194	6.77485	5.7144	4.15485	1.2314	2.35512
ENSG00000127870.16_2	RNF6	chr13:26706253-26796630	-	protein_coding	-1.21948	0.429437	0.00049577	0.207356	2.93766	4.15715	17.5621	15.7623	17.2522	6.98718	7.50919	5.6175
ENSG00000114270.16_2	COL7A1	chr3:48601506-48632700	-	protein_coding	-1.16728	0.445261	0.00072686	0.208546	5.30817	6.47545	78.7413	98.4616	87.833	43.4891	35.9324	36.8526
ENSG00000173599.13_1	PC	chr11:66615704-66725847	-	protein_coding	-1.1564	0.44863	0.0323259	0.333622	3.06029	4.2167	22.2088	14.9905	16.3197	9.73416	4.36058	9.08653
ENSG00000156804.7_1	FBXO32	chr8:124510129-124553446	-	protein_coding	-1.1387	0.454167	0.014451	0.283801	1.1183	2.25701	3.66474	5.59685	2.54907	1.47031	0.997875	1.07303
ENSG00000214290.7_1	COLCA2	chr11:111169271-111179460	+	protein_coding	-1.13217	0.45623	0.0123741	0.272502	1.57809	2.71026	5.59633	5.80409	5.24503	2.98445	1.1475	2.1107
ENSG00000156466.9_1	GDF6	chr8:97154558-97173020	-	protein_coding	-1.0914	0.469306	0.0271307	0.326083	1.9212	3.0126	8.19628	7.3152	5.87333	3.87398	1.52315	3.41767
ENSG00000082074.15_2	FYB	chr5:39105338-39274630	-	protein_coding	-1.08943	0.469946	0.0379784	0.34651	2.50035	3.58979	16.8558	9.75393	8.08977	6.48523	3.73434	4.11186
ENSG00000185453.12_2	C19orf68	chr19:48673949-48700877	+	protein_coding	-1.0862	0.471001	0.000214977	0.18946	1.44775	2.53395	4.26576	4.92486	5.22649	1.83422	1.56263	1.79465
ENSG00000105357.15_2	MYH14	chr19:50691443-50813802	+	protein_coding	-1.06821	0.476909	0.007219	0.251642	2.93567	4.00388	14.6573	15.9487	14.56	7.90539	4.73797	7.76514
ENSG00000101986.11_1	ABCD1	chrX:152990323-153010216	+	protein_coding	-1.05265	0.482083	0.0139119	0.28208	1.69109	2.74373	6.19503	6.47452	4.58755	3.06598	1.44498	2.38658
ENSG00000176597.11_1	B3GNT5	chr3:182971032-183016292	+	protein_coding	-1.04218	0.485594	0.0113148	0.269996	2.94214	3.98432	15.3459	15.1618	14.0072	9.39795	5.0205	6.25166
ENSG00000149115.13_1	TNKS1BP1	chr11:57067112-57092426	-	protein_coding	-1.03333	0.488581	0.0160412	0.289004	4.40315	5.43648	44.0576	44.659	38.4761	21.7231	14.2383	26.3549
ENSG00000171992.12_1	SYNPO	chr5:149980642-150038782	+	protein_coding	-1.02991	0.48974	0.0123329	0.272502	1.26069	2.2906	4.19128	5.17749	2.65202	1.6727	1.33476	1.20457
ENSG00000169242.11_1	EFNA1	chr1:155099936-155107333	+	protein_coding	-0.991627	0.50291	0.0189388	0.301803	3.81894	4.81057	22.9781	26.7469	32.2162	16.1328	9.41543	14.7524
ENSG00000078804.12_2	TP53INP2	chr20:33292094-33301243	+	protein_coding	-0.984063	0.505554	0.0324173	0.333622	2.91364	3.8977	15.1016	14.2736	12.4638	8.96833	4.04934	7.50007
ENSG00000116661.9_1	FBXO2	chr1:11708424-11715842	-	protein_coding	-0.95596	0.515499	0.0249524	0.317053	1.83599	2.79195	6.89506	6.1012	4.92514	3.80737	1.66888	2.54676
ENSG00000159335.15_1	PTMS	chr12:6874682-6880118	+	protein_coding	-0.955896	0.515521	0.0334942	0.334715	3.93363	4.88953	20.7997	37.9858	29.6427	16.9564	11.0233	15.5265
ENSG00000186510.11_1	CLCNKA	chr1:16345370-16360545	+	protein_coding	-0.952062	0.516893	0.03225	0.333622	0.81995	1.77201	2.20987	2.93357	2.1551	0.571975	0.361898	1.56979
ENSG00000282936.1_1	CTC-281F24.5	chr17:6540100-6543636	-	protein_coding	-0.944117	0.519747	0.00106638	0.21415	0.493204	1.43732	1.61055	1.77246	1.74431	0.559018	0.21607	0.470951
ENSG00000185215.8_2	TNFAIP2	chr14:103589779-103603776	+	protein_coding	-0.931175	0.524431	0.0426299	0.352874	4.77337	5.70455	59.5952	64.1976	34.8964	32.058	26.7851	21.2688
ENSG00000173267.13_1	SNCG	chr10:88718375-88723017	+	protein_coding	-0.928999	0.525223	0.0368102	0.343247	5.92001	6.84901	137.079	110.029	98.9332	76.9628	41.1398	66.5654
ENSG00000166225.8_2	FRS2	chr12:69864129-69973569	+	protein_coding	-0.922668	0.527533	0.0491739	0.364112	1.90101	2.82368	5.28108	6.6596	6.37562	4.79789	2.10089	1.89755
ENSG00000106018.13_1	VIPR2	chr7:158820866-158937649	-	protein_coding	-0.913804	0.530784	0.0124157	0.272502	0.858368	1.77217	2.52065	2.45198	2.27898	1.1033	0.356716	1.0883
ENSG00000171219.8_1	CDC42BPG	chr11:64590859-64612041	-	protein_coding	-0.908591	0.532705	0.00405827	0.248099	4.31675	5.22535	37.4235	36.6452	35.1952	22.8658	15.6013	18.9756
ENSG00000198719.8_1	DLL1	chr6:170591294-170615653	-	protein_coding	-0.906212	0.533584	0.0033134	0.246576	2.77412	3.68033	14.1246	10.5483	11.0633	6.60364	5.67479	5.30691
ENSG00000197872.11_2	FAM49A	chr2:16730727-16847599	-	protein_coding	-0.89997	0.535898	0.00323735	0.246576	1.72767	2.62764	4.60406	5.92064	5.08615	2.23869	1.93199	2.82566
ENSG00000139132.14_2	FGD4	chr12:32552463-32798984	+	protein_coding	-0.897355	0.53687	0.000754918	0.208546	1.16064	2.05799	2.72457	3.59935	3.21482	1.14328	1.35479	1.21374
ENSG00000258790.1_2	RP11-561B11.2	chr14:35591755-35786680	+	protein_coding	-0.890808	0.539312	0.04938	0.364112	1.79837	2.68918	3.49695	7.69953	5.8573	1.80092	2.81882	2.93421
ENSG00000182240.15_2	BACE2	chr21:42539728-42654445	+	protein_coding	-0.879289	0.543635	0.00088192	0.21415	3.69216	4.57145	24.6507	21.9519	21.8304	12.6421	10.5333	12.7253
ENSG00000159403.11	C1R	chr12:7187513-7245203	-	protein_coding	-0.860378	0.550808	0.0279215	0.329239	1.73295	2.59333	5.78959	5.71633	3.81986	2.91193	1.53551	2.70301
ENSG00000168874.12_1	ATOH8	chr2:85978467-86015189	+	protein_coding	-0.854223	0.553163	0.0237812	0.313713	2.47269	3.32692	9.91874	8.97099	8.28101	5.94869	3.07261	5.04351
ENSG00000173269.13_2	MMRN2	chr10:88695297-88729238	-	protein_coding	-0.835458	0.560405	0.0119027	0.271999	1.48438	2.31983	4.75987	3.88407	3.42408	2.26753	1.27531	1.94621
ENSG00000148180.18_2	GSN	chr9:123970072-124095121	+	protein_coding	-0.834096	0.560935	0.0324433	0.333622	3.41686	4.25095	18.7876	17.8663	17.4891	10.5502	6.59283	12.8912
ENSG00000157227.12_1	MMP14	chr14:23305766-23318236	+	protein_coding	-0.830808	0.562214	0.00255373	0.232372	4.81661	5.64742	48.8113	50.404	48.1812	29.0505	22.826	30.2555
ENSG00000135925.8_1	WNT10A	chr2:219745085-219764303	+	protein_coding	-0.821281	0.565939	0.0352935	0.340767	2.29909	3.12037	7.03379	9.56641	6.74684	2.92716	3.60126	5.5967
ENSG00000223573.6_2	TINCR	chr19:5558178-5568045	-	protein_coding	-0.813577	0.568969	0.0208654	0.307568	1.12433	1.93791	2.94262	2.54171	3.02819	1.28473	0.655634	1.7389
ENSG00000019144.17_2	PHLDB1	chr11:118477155-118528748	+	protein_coding	-0.813197	0.569119	0.0110311	0.267951	1.90109	2.71429	4.82099	6.70244	5.30411	2.1088	2.93743	3.25652
ENSG00000145040.3_2	UCN2	chr3:48599160-48601206	-	protein_coding	-0.808511	0.570971	0.0275814	0.328554	2.68134	3.48985	7.46784	11.8824	11.9982	4.4328	6.23847	5.71154
ENSG00000172037.13_1	LAMB2	chr3:49158547-49170551	-	protein_coding	-0.807199	0.57149	0.001189	0.21415	4.13015	4.93735	31.8134	30.163	27.1306	17.4328	14.8204	17.4114
ENSG00000179862.6_1	CITED4	chr1:41326723-41328038	-	protein_coding	-0.806394	0.571809	0.0234592	0.31342	4.92471	5.7311	61.9512	51.8675	44.0308	33.2785	22.7339	33.4401
ENSG00000165458.13_2	INPPL1	chr11:71934745-71950149	+	protein_coding	-0.803994	0.572761	0.00872032	0.261005	4.87755	5.68154	46.0063	51.3738	53.9126	26.137	24.7678	35.3266
ENSG00000131016.16_1	AKAP12	chr6:151561134-151679692	+	protein_coding	-0.794671	0.576475	0.0390531	0.347461	6.00517	6.79984	110.4	127.982	95.262	71.9203	76.9584	45.6121
ENSG00000108852.14_1	MPP2	chr17:41952725-41987079	-	protein_coding	-0.792857	0.5772	0.0133212	0.27704	0.950199	1.74306	2.16162	2.21279	2.6927	0.947169	0.563498	1.36927
ENSG00000070731.10_2	ST6GALNAC2	chr17:74561461-74583038	-	protein_coding	-0.779953	0.582386	0.0411274	0.348876	2.55557	3.33553	12.3424	8.69311	6.95391	5.97796	3.90227	4.93999
ENSG00000095383.19_1	TBC1D2	chr9:100961281-101018003	-	protein_coding	-0.776349	0.583843	0.0225947	0.31342	4.32436	5.1007	40.5829	25.6927	35.399	21.1687	16.4849	19.7433
ENSG00000077092.18_2	RARB	chr3:25215823-25639423	+	protein_coding	-0.7729	0.58524	0.0199553	0.304733	1.23132	2.00422	3.15636	3.63563	2.35093	1.28504	0.982216	1.85722
ENSG00000007944.14_1	MYLIP	chr6:16129356-16148479	+	protein_coding	-0.772447	0.585424	0.0374924	0.345369	1.64604	2.41849	5.47877	3.93073	3.78307	2.52162	1.34265	2.71596
ENSG00000143793.12_1	C1orf35	chr1:228288427-228293112	-	protein_coding	-0.764691	0.58858	0.00931529	0.262071	1.62876	2.39345	3.98148	4.09052	4.71983	2.76694	1.97154	1.6421
ENSG00000139679.15_1	LPAR6	chr13:48963703-49018840	-	protein_coding	-0.761176	0.590015	0.000614745	0.208546	0.279316	1.04049	1.14129	1.1681	0.87457	0.278699	0.165788	0.199112
ENSG00000169231.13_1	THBS3	chr1:155165379-155178842	-	protein_coding	-0.760168	0.590427	0.0165868	0.291081	1.19186	1.95203	3.73465	2.89443	2.1414	1.55124	1.07484	1.25226
ENSG00000060491.16_1	OGFR	chr20:61436187-61445352	+	protein_coding	-0.759297	0.590784	0.00698361	0.251642	3.50601	4.26531	18.6455	18.0099	18.0419	11.3313	8.26456	11.8353
ENSG00000163346.16_1	PBXIP1	chr1:154916552-154928599	-	protein_coding	-0.756683	0.591855	0.0410015	0.348876	1.80944	2.56612	5.84295	5.36779	3.76654	3.52252	1.8219	2.37412
ENSG00000100739.10_2	BDKRB1	chr14:96722161-96735304	+	protein_coding	-0.753689	0.593085	0.0296478	0.332215	1.23613	1.98982	3.68502	3.30462	2.107	1.8546	1.14804	1.13182
ENSG00000129932.7_2	DOHH	chr19:3490819-3500938	-	protein_coding	-0.739474	0.598958	0.000921979	0.21415	1.86599	2.60546	4.82379	4.85078	5.61526	2.95416	2.49561	2.50411
ENSG00000102401.19_2	ARMCX3	chrX:100877787-100882833	+	protein_coding	-0.733424	0.601475	0.000605672	0.208546	3.11691	3.85033	13.5593	12.9307	13.7938	8.55891	7.31224	7.21716
ENSG00000074855.10_2	ANO8	chr19:17434032-17445638	-	protein_coding	-0.729509	0.603109	0.0162748	0.289004	2.54247	3.27197	9.08729	7.59	9.40207	4.36787	4.06658	6.2704
ENSG00000277117.4_1	CH507-9B2.1	chr21:45642880-45660887	-	protein_coding	-0.726351	0.604431	0.0115695	0.271999	0.955089	1.68144	1.68054	2.60745	2.41247	1.1982	0.735847	0.909645
ENSG00000132510.10_1	KDM6B	chr17:7743222-7758114	+	protein_coding	-0.721842	0.606323	0.0067211	0.24992	2.34662	3.06846	7.85395	6.92726	7.4108	5.10922	3.65984	3.62224
ENSG00000111859.16_2	NEDD9	chr6:11183531-11382581	-	protein_coding	-0.716808	0.608442	0.0204772	0.307329	2.90932	3.62613	9.38755	14.8997	10.3977	6.354	6.18375	7.02605
ENSG00000139508.14_1	SLC46A3	chr13:29274201-29293107	-	protein_coding	-0.71676	0.608462	0.0169053	0.291933	1.22618	1.94294	2.69413	3.57252	2.36499	1.6468	0.976024	1.44815
ENSG00000145860.11_2	RNF145	chr5:158584417-158637061	-	protein_coding	-0.716004	0.608781	0.000837411	0.210148	3.80826	4.52426	24.0256	19.9298	22.2631	13.3788	12.521	13.1406
ENSG00000162591.15_1	MEGF6	chr1:3406484-3528059	-	protein_coding	-0.708876	0.611797	0.00533216	0.248099	1.41562	2.1245	2.80844	4.06635	3.29705	1.71287	1.49957	1.79988
ENSG00000138834.12_2	MAPK8IP3	chr16:1756184-1820318	+	protein_coding	-0.705096	0.613402	0.00572163	0.248099	3.26049	3.96558	16.501	14.9719	12.6414	9.19961	7.60527	9.0269
ENSG00000079215.13_1	SLC1A3	chr5:36606457-36688436	+	protein_coding	-0.704813	0.613522	0.0325653	0.333622	5.00293	5.70775	55.5	49.0842	49.4499	40.2461	23.784	31.2512
ENSG00000178537.9_1	SLC25A20	chr3:48894364-48936426	-	protein_coding	-0.703488	0.614086	0.00405044	0.248099	2.33098	3.03447	8.42158	6.43594	6.85124	3.83254	4.45545	3.83146
ENSG00000107816.17_2	LZTS2	chr10:102756375-102767593	+	protein_coding	-0.701619	0.614882	0.0386861	0.346598	3.19469	3.89631	15.864	12.9115	13.0728	9.64765	5.81331	9.57981
ENSG00000125089.16_2	SH3TC1	chr4:8183799-8243530	+	protein_coding	-0.70032	0.615436	0.00610694	0.248099	1.37396	2.07429	3.10216	2.81348	3.77454	1.74133	1.2837	1.78107
ENSG00000196739.14_1	COL27A1	chr9:116917840-117074791	+	protein_coding	-0.692126	0.618941	0.00616515	0.248099	1.96151	2.65363	5.9897	5.73652	4.29146	2.90974	3.05985	2.72186
ENSG00000176788.8_2	BASP1	chr5:17065707-17276952	+	protein_coding	-0.688488	0.620504	0.0164162	0.289097	6.8648	7.55329	193.517	189.337	177.986	123.652	91.7606	135.922
ENSG00000127561.14_1	SYNGR3	chr16:2039661-2044276	+	protein_coding	-0.683736	0.622551	0.0192974	0.303355	1.08423	1.76797	2.37918	2.36815	2.47079	1.25644	0.667254	1.53357
ENSG00000171298.12_1	GAA	chr17:78075355-78093678	+	protein_coding	-0.683125	0.622815	0.0328298	0.333893	3.66357	4.3467	24.5408	17.2048	17.115	12.1267	9.60044	13.6236
ENSG00000086598.10_1	TMED2	chr12:124069078-124083124	+	protein_coding	-0.682242	0.623196	0.000184854	0.185557	5.68794	6.37018	78.0995	81.4341	85.8099	48.2145	51.9085	51.6145
ENSG00000197444.9_1	OGDHL	chr10:50942689-50970425	-	protein_coding	-0.681983	0.623308	0.00619005	0.248099	0.870124	1.55211	1.90702	1.77799	2.12258	1.00004	0.548902	0.971237
ENSG00000137699.12	TRIM29	chr11:119981983-120056237	-	protein_coding	-0.681028	0.623721	0.0160921	0.289004	4.29871	4.97974	31.3142	27.3449	33.2993	18.2123	15.6671	22.8059
ENSG00000161328.10_1	LRRC56	chr11:537527-554916	+	protein_coding	-0.679585	0.624345	0.0058451	0.248099	1.07793	1.75751	2.61911	2.36351	2.17538	1.45482	1.04228	0.876418
ENSG00000054277.13_2	OPN3	chr1:241753404-241840678	-	protein_coding	-0.679174	0.624523	0.0131917	0.276869	2.98539	3.66456	11.3193	10.3031	13.6435	7.46027	5.74621	7.70219
ENSG00000174939.10_1	ASPHD1	chr16:29911696-29931185	+	protein_coding	-0.678856	0.62466	0.0203043	0.306381	2.41053	3.08939	9.27846	6.44273	7.06005	5.24571	3.88074	3.93017
ENSG00000135821.17_2	GLUL	chr1:182350839-182361341	-	protein_coding	-0.675333	0.626188	0.0154346	0.287959	4.95363	5.62897	44.2425	60.1925	42.7743	30.3631	27.5392	32.2444
ENSG00000176845.12_1	METRNL	chr17:81037567-81052864	+	protein_coding	-0.675295	0.626204	0.0188963	0.301803	2.45873	3.13403	8.98729	7.47507	6.99318	5.00881	3.47586	5.17724
ENSG00000167549.18_2	CORO6	chr17:27941774-27949925	-	protein_coding	-0.673401	0.627027	0.00334444	0.246849	1.0605	1.7339	2.24675	2.59682	2.15139	1.25036	0.840258	1.19078
ENSG00000122970.15_1	IFT81	chr12:110562140-110656602	+	protein_coding	-0.672132	0.627578	0.0126569	0.273025	2.52485	3.19699	7.2505	7.83234	9.58303	4.56131	4.12338	5.69016
ENSG00000065325.12_1	GLP2R	chr17:9725523-9795419	+	protein_coding	-0.671642	0.627792	0.04953	0.364112	0.972667	1.64431	1.42071	2.94916	2.1953	0.888466	0.722282	1.32377
ENSG00000058453.16_2	CROCC	chr1:17066768-17299474	+	protein_coding	-0.668663	0.629089	0.00521006	0.248099	0.709667	1.37833	1.53691	1.62878	1.63449	0.910132	0.439307	0.591022
ENSG00000008382.15_2	MPND	chr19:4343524-4360083	+	protein_coding	-0.667858	0.629441	0.0390448	0.347461	1.9012	2.56906	5.61799	4.33202	4.92208	3.45852	1.83421	3.12415
ENSG00000205903.6_2	ZNF316	chr7:6676953-6696063	+	protein_coding	-0.667705	0.629507	0.00264546	0.232372	3.03345	3.70116	12.3138	11.5489	12.1696	7.83329	6.16216	7.67591
ENSG00000111799.20_1	COL12A1	chr6:75794042-75915767	-	protein_coding	-0.665399	0.630514	0.0313959	0.333622	5.33534	6.00074	58.8555	69.8289	60.9285	32.0322	37.4415	50.8265
ENSG00000186765.11_1	FSCN2	chr17:79495422-79504156	+	protein_coding	-0.665342	0.630539	0.0193731	0.303461	0.833714	1.49906	2.33522	1.88848	1.34417	0.862067	0.564943	0.942784
ENSG00000167674.14_2	CTB-50L17.10	chr19:4472284-4502223	+	protein_coding	-0.663671	0.63127	0.0101325	0.264968	3.31514	3.97881	14.4891	14.9237	14.8911	10.2499	7.16561	9.73328
ENSG00000166869.2_1	CHP2	chr16:23765948-23770272	+	protein_coding	-0.661074	0.632407	0.00669969	0.24992	0.436615	1.09769	1.42944	1.04893	0.969155	0.377347	0.208165	0.489817
ENSG00000167676.4_2	PLIN4	chr19:4502192-4518477	-	protein_coding	-0.65969	0.633015	0.0166545	0.291589	0.898355	1.55805	2.27549	1.75005	1.83425	0.937565	0.536973	1.17457
ENSG00000132640.14_2	BTBD3	chr20:11871371-11907257	+	protein_coding	-0.657735	0.633873	0.0480592	0.364112	3.08589	3.74363	11.0012	12.9145	13.3926	5.90797	6.75783	10.4222
ENSG00000123933.15_2	MXD4	chr4:2249159-2264021	-	protein_coding	-0.653562	0.635709	0.024021	0.314419	2.15403	2.80759	7.15283	5.6286	5.35003	4.1141	2.64718	3.72665
ENSG00000186493.11_1	C5orf38	chr5:2752245-2755511	+	protein_coding	-0.653411	0.635775	0.0251049	0.317513	4.73574	5.38915	47.8677	38.2243	37.3981	29.1981	20.6565	27.922
ENSG00000188747.8_2	NOXA1	chr9:140317802-140328858	+	protein_coding	-0.652844	0.636025	0.0104638	0.264968	1.12159	1.77444	2.90039	2.3769	2.03983	1.46133	0.942378	1.15474
ENSG00000139192.11_2	TAPBPL	chr12:6560856-6575683	+	protein_coding	-0.652397	0.636222	0.0335226	0.334715	2.04075	2.69315	6.0635	5.42601	4.95932	3.52347	2.16184	3.8705
ENSG00000185585.19_2	OLFML2A	chr9:127539437-127577164	+	protein_coding	-0.646833	0.638681	0.0160216	0.289004	2.78768	3.43452	9.5984	11.0403	8.90378	7.07736	4.7987	6.0296
ENSG00000119414.11_1	PPP6C	chr9:127908852-127952218	-	protein_coding	-0.645284	0.639367	0.00136249	0.21415	3.33602	3.98131	15.1839	15.688	13.5878	9.20694	9.73836	8.39495
ENSG00000169031.18_1	COL4A3	chr2:228029281-228179508	+	protein_coding	-0.644261	0.639821	0.0305143	0.332215	2.28702	2.93128	5.88764	8.75283	5.60703	4.08952	4.24296	3.35641
ENSG00000173442.12_1	EHBP1L1	chr11:65343509-65360121	+	protein_coding	-0.644152	0.639869	0.0239148	0.314259	2.82961	3.47376	11.1844	10.044	9.19037	7.81239	5.85161	4.94984
ENSG00000259332.3_2	ST20-MTHFS	chr15:80137492-80216096	-	protein_coding	-0.643917	0.639973	0.0354351	0.341052	1.5762	2.22011	3.80621	3.34711	3.84126	1.80858	1.43022	2.8843
ENSG00000175467.14_1	SART1	chr11:65729160-65747299	+	protein_coding	-0.639588	0.641896	0.0046533	0.248099	4.41362	5.05321	30.7491	30.3758	35.7431	20.5815	18.1415	22.4337
ENSG00000205236.6_2	RP11-514P8.6	chr7:102222970-102283316	-	protein_coding	-0.639223	0.642059	0.0023234	0.232372	0.911935	1.55116	1.90215	2.20351	1.70701	0.991112	0.734218	0.929123
ENSG00000012822.15_2	CALCOCO1	chr12:54102301-54121529	-	protein_coding	-0.638358	0.642444	0.030163	0.332215	1.52031	2.15867	4.24332	3.82388	2.51942	2.19694	1.62557	1.81203
ENSG00000239521.7_2	GATS	chr7:99798276-99869841	-	protein_coding	-0.638329	0.642457	0.0451146	0.358557	1.56571	2.20404	4.45067	3.35858	3.11765	2.60449	1.33008	2.0886
ENSG00000186807.9	ANXA8L2	chr10:47746936-47763041	+	protein_coding	-0.635494	0.64372	0.00580214	0.248099	5.76153	6.39702	77.165	92.8198	80.6173	47.5812	53.8558	58.9088
ENSG00000178980.14_2	SEPW1	chr19:48281829-48287943	+	protein_coding	-0.635309	0.643803	0.00586243	0.248099	2.33974	2.97505	6.63927	6.7212	7.24134	3.52423	3.86663	4.89144
ENSG00000122711.8_1	SPINK4	chr9:33218363-33248565	+	protein_coding	-0.631254	0.645615	0.042864	0.353102	0.825175	1.45643	2.54413	1.25918	1.58123	1.0244	0.639123	0.676099
ENSG00000235863.3_1	B3GALT4	chr6:33244909-33252609	+	protein_coding	-0.628799	0.646714	0.0126929	0.273025	1.20634	1.83514	2.71503	3.05878	2.01258	1.54791	1.21658	1.17553
ENSG00000265763.3_1	ZNF488	chr10:48355089-48373866	+	protein_coding	-0.626425	0.64778	0.022926	0.31342	2.6817	3.30813	8.75526	9.83964	8.1893	5.14477	4.43111	6.91451
ENSG00000154188.9_2	ANGPT1	chr8:108261710-108510283	-	protein_coding	-0.624979	0.648429	0.00245038	0.232372	0.515001	1.13998	1.27653	1.24411	1.09501	0.542768	0.274275	0.484323
ENSG00000135924.15_1	DNAJB2	chr2:220143989-220151622	+	protein_coding	-0.624599	0.6486	0.00887181	0.261005	3.3444	3.969	13.4021	17.4421	13.4586	9.59892	8.38444	9.53471
ENSG00000005469.11_1	CROT	chr7:86974997-87029111	+	protein_coding	-0.623812	0.648954	0.00830308	0.257155	2.77666	3.40047	10.0552	9.74914	8.90815	6.73245	4.84878	6.11529
ENSG00000178209.14_2	PLEC	chr8:144989315-145050902	-	protein_coding	-0.623696	0.649006	0.00488676	0.248099	5.58621	6.2099	72.3293	77.5662	69.4027	52.8233	47.6817	41.3169
ENSG00000173898.11_1	SPTBN2	chr11:66452719-66496697	-	protein_coding	-0.621854	0.649835	0.00235258	0.232372	4.08866	4.71051	26.1549	24.3512	25.0716	16.6781	14.1399	17.4021
ENSG00000105928.13_2	DFNA5	chr7:24737972-24797732	-	protein_coding	-0.621232	0.650116	0.00751553	0.252484	2.63892	3.26015	7.70545	8.6771	9.43934	4.57931	6.05728	5.1371
ENSG00000127022.14_2	CANX	chr5:179105629-179157926	+	protein_coding	-0.618335	0.651422	0.000689123	0.208546	6.43343	7.05176	126.301	129.94	139.112	87.6959	79.6293	89.2754
ENSG00000154556.17_2	SORBS2	chr4:186506598-186877806	-	protein_coding	-0.616759	0.652134	0.0132705	0.276869	0.953505	1.57026	2.18051	2.13007	1.6305	1.26814	0.836856	0.743232
ENSG00000105559.11_1	PLEKHA4	chr19:49340354-49371889	-	protein_coding	-0.613092	0.653794	0.0266351	0.323997	0.99085	1.60394	2.58753	2.27781	1.3885	0.963805	0.9588	1.04051
ENSG00000100813.14_2	ACIN1	chr14:23527773-23564823	-	protein_coding	-0.611412	0.654556	0.0175526	0.294309	3.7583	4.36971	19.4812	19.2013	20.3553	13.4072	9.97691	14.6682
ENSG00000175874.9_1	CREG2	chr2:101962013-102004057	-	protein_coding	-0.608777	0.655752	0.0379189	0.346237	2.34239	2.95117	7.11598	7.91003	5.39659	5.1052	3.84898	3.40593
ENSG00000177508.11_1	IRX3	chr16:54317216-54320675	-	protein_coding	-0.608624	0.655822	0.0461254	0.36041	3.10742	3.71605	14.6205	11.5986	10.532	8.27844	5.85226	9.06867
ENSG00000173621.8_2	LRFN4	chr11:66624118-66627946	+	protein_coding	-0.607303	0.656423	0.00684763	0.251475	4.9571	5.56441	46.9111	43.7769	48.3935	30.0868	26.1832	34.4678
ENSG00000139973.16_2	SYT16	chr14:62278692-62579268	+	protein_coding	-0.604629	0.65764	0.0209797	0.307887	1.16498	1.76961	2.03939	2.5794	2.64354	1.20043	0.912495	1.67903
ENSG00000169871.12_2	TRIM56	chr7:100728720-100741248	+	protein_coding	-0.604114	0.657875	0.02889	0.332215	3.67883	4.28295	17.9932	20.1066	17.4021	14.2502	9.21795	12.4796
ENSG00000160183.13_1	TMPRSS3	chr21:43791999-43816955	-	protein_coding	-0.602497	0.658613	0.0378647	0.346162	0.965524	1.56802	1.78632	2.49636	1.67558	1.097	0.578055	1.25027
ENSG00000245848.2_1	CEBPA	chr19:33790840-33793470	-	protein_coding	-0.602247	0.658727	0.0484029	0.364112	2.40654	3.00879	9.05774	6.21034	6.19034	5.30216	3.48206	4.2766
ENSG00000160781.15_1	PAQR6	chr1:156213112-156217908	-	protein_coding	-0.601781	0.65894	0.0321796	0.333622	1.01913	1.62091	2.4474	1.99855	1.81463	1.47987	0.666946	1.01378
ENSG00000197448.13_1	GSTK1	chr7:142941186-142967947	+	protein_coding	-0.595914	0.661625	0.0194122	0.30352	4.02646	4.62237	26.8518	24.734	19.8477	15.3571	13.4897	17.2596
ENSG00000166289.5_1	PLEKHF1	chr19:30155963-30166364	+	protein_coding	-0.593851	0.662572	0.00401272	0.248099	2.35929	2.95314	7.58384	6.65247	6.07076	4.33205	3.73409	4.35202
ENSG00000171346.14_2	KRT15	chr17:39669995-39678781	-	protein_coding	-0.592742	0.663081	0.036399	0.342311	1.76698	2.35972	4.92684	4.43558	3.19734	2.97062	1.98799	2.32282
ENSG00000173391.8_2	OLR1	chr12:10310900-10324737	-	protein_coding	-0.589002	0.664803	0.0440761	0.355802	6.45712	7.04612	117.484	135.382	141.844	76.7661	75.6959	112.709
ENSG00000165591.6_1	FAAH2	chrX:57313139-57515629	+	protein_coding	-0.588431	0.665066	0.0421623	0.350545	2.39025	2.97868	8.43117	7.02666	5.47013	5.21555	3.84565	3.78384
ENSG00000259399.1_2	TGIF2-C20orf24	chr20:35202956-35240787	+	protein_coding	-0.586626	0.665899	0.00216768	0.230175	0.0760164	0.662642	0.654741	0.495899	0.602482	0.006105	0.164143	0
