# Supplementary material for: Transcriptomic Sequencing of Airway Epithelial Cell NCI-H292 Induced by Synthetic Cationic Polypeptides
Source: Biomed Res Int. 2019 Apr 1;2019:3638469. doi: 10.1155/2019/3638469 (PMC6463615; doi:10.1155/2019/3638469)
Supplement: Supplementary Materials — Supplemental Excel 1 shows a total of 230 differentially expressed genes of which 86 were upregulated and 144 were downregulated. Table S1 lists upregulated KEGG pathways. Table S2 shows downregulated KEGG pathways. [file 3638469.f1.zip › 3638469.f1/Table S1.xls]

## Sheet: KEGG
Column "ID" stands for pathway identifier used in KEGG
Column "Term" stands for the name of the pathway
Column "WebSite"stands for The map's website,the nodes with red frame and red symbol are associated with the DE genes, green nodes have no significance
Column "Count" stands for the count of the DE genes directly associated with the listed pathway
Column "Size" stands for the count of the chosen background population genes associated with the listed pathway
Column "numInt" stands for the total number of the DE genes
Column "numTotal" stands for the total number of background population genes
Column "p_value" stands for the enrichment p-value of the pathway used Fisher exact test
Column "fdr" stands for the false discovery rate of the pathway
Column "Enrichment_Score" stands for the Enrichment Score value of the pathway, it equals "-log10(p_value)"
Column "GeneRatio" stands for the Gene Ratio value of the pathway, it equals "Count/numInt"
Column "Genes" stands for the DE genes associated with the pathway
ID	Term	WebSite	Count	Size	numInt	numTotal	p_value	fdr	Enrichment_Score	GeneRatio	Genes
hsa00100	Steroid_biosynthesis	http://www.genome.jp/kegg-bin/show_pathway?hsa00100+1595+2222+6307+6713	4	20	37	7257	2.61423e-06	0.000250966	5.58266	0.108108	CYP51A1//FDFT1//MSMO1//SQLE
hsa00900	Terpenoid_backbone_biosynthesis	http://www.genome.jp/kegg-bin/show_pathway?hsa00900+39+3157+3422	3	22	37	7257	0.000175783	0.00843757	3.75502	0.0810811	ACAT2//HMGCS1//IDI1
hsa00750	Vitamin_B6_metabolism	http://www.genome.jp/kegg-bin/show_pathway?hsa00750+57026+29968	2	6	37	7257	0.000374583	0.0119866	3.42645	0.0540541	PDXP//PSAT1
hsa00072	Synthesis_and_degradation_of_ketone_bodies	http://www.genome.jp/kegg-bin/show_pathway?hsa00072+39+3157	2	10	37	7257	0.00110938	0.0266252	2.95492	0.0540541	ACAT2//HMGCS1
hsa04978	Mineral_absorption	http://www.genome.jp/kegg-bin/show_pathway?hsa04978+4493+4494+4502	3	51	37	7257	0.00214724	0.0412269	2.66812	0.0810811	MT1E//MT1F//MT2A
hsa04110	Cell_cycle	http://www.genome.jp/kegg-bin/show_pathway?hsa04110+595+9134+993+990	4	124	37	7257	0.00346826	0.0554921	2.45989	0.108108	CCND1//CCNE2//CDC25A//CDC6
hsa05222	Small_cell_lung_cancer	http://www.genome.jp/kegg-bin/show_pathway?hsa05222+595+9134+1163	3	84	37	7257	0.00875549	0.105557	2.05772	0.0810811	CCND1//CCNE2//CKS1B
hsa00650	Butanoate_metabolism	http://www.genome.jp/kegg-bin/show_pathway?hsa00650+39+3157	2	28	37	7257	0.00879641	0.105557	2.05569	0.0540541	ACAT2//HMGCS1
hsa00260	Glycine_serine_and_threonine_metabolism	http://www.genome.jp/kegg-bin/show_pathway?hsa00260+211+29968	2	40	37	7257	0.0174696	0.186342	1.75772	0.0540541	ALAS1//PSAT1
hsa01100	Metabolic_pathways	http://www.genome.jp/kegg-bin/show_pathway?hsa01100+39+211+1595+2222+3157+3422+6307+4907+4953+57026+29968+6713	12	1270	37	7257	0.0199556	0.191573	1.69994	0.324324	ACAT2//ALAS1//CYP51A1//FDFT1//HMGCS1//IDI1//MSMO1//NT5E//ODC1//PDXP//PSAT1//SQLE
hsa00280	Valine_leucine_and_isoleucine_degradation	http://www.genome.jp/kegg-bin/show_pathway?hsa00280+39+3157	2	48	37	7257	0.0246291	0.214945	1.60855	0.0540541	ACAT2//HMGCS1
hsa05161	Hepatitis_B	http://www.genome.jp/kegg-bin/show_pathway?hsa05161+595+9134+353376	3	144	37	7257	0.0363725	0.29098	1.43923	0.0810811	CCND1//CCNE2//TICAM2
hsa04115	p53_signaling_pathway	http://www.genome.jp/kegg-bin/show_pathway?hsa04115+595+9134	2	68	37	7257	0.0466873	0.344767	1.3308	0.0540541	CCND1//CCNE2
hsa05215	Prostate_cancer	http://www.genome.jp/kegg-bin/show_pathway?hsa05215+595+9134	2	87	37	7257	0.0722242	0.495251	1.14132	0.0540541	CCND1//CCNE2
