# Supplementary material for: Transcriptomic Sequencing of Airway Epithelial Cell NCI-H292 Induced by Synthetic Cationic Polypeptides
Source: Biomed Res Int. 2019 Apr 1;2019:3638469. doi: 10.1155/2019/3638469 (PMC6463615; doi:10.1155/2019/3638469)
Supplement: Supplementary Materials — Supplemental Excel 1 shows a total of 230 differentially expressed genes of which 86 were upregulated and 144 were downregulated. Table S1 lists upregulated KEGG pathways. Table S2 shows downregulated KEGG pathways. [file 3638469.f1.zip › 3638469.f1/Table S2.xls]

## Sheet: KEGG
Column "ID" stands for pathway identifier used in KEGG
Column "Term" stands for the name of the pathway
Column "WebSite"stands for The map's website,the nodes with red frame and red symbol are associated with the DE genes, green nodes have no significance
Column "Count" stands for the count of the DE genes directly associated with the listed pathway
Column "Size" stands for the count of the chosen background population genes associated with the listed pathway
Column "numInt" stands for the total number of the DE genes
Column "numTotal" stands for the total number of background population genes
Column "p_value" stands for the enrichment p-value of the pathway used Fisher exact test
Column "fdr" stands for the false discovery rate of the pathway
Column "Enrichment_Score" stands for the Enrichment Score value of the pathway, it equals "-log10(p_value)"
Column "GeneRatio" stands for the Gene Ratio value of the pathway, it equals "Count/numInt"
Column "Genes" stands for the DE genes associated with the pathway
ID	Term	WebSite	Count	Size	numInt	numTotal	p_value	fdr	Enrichment_Score	GeneRatio	Genes
hsa04512	ECM-receptor_interaction	http://www.genome.jp/kegg-bin/show_pathway?hsa04512+1285+1605+3913+7059	4	82	53	7257	0.00291229	0.16718	2.53576	0.0754717	COL4A3//DAG1//LAMB2//THBS3
hsa04974	Protein_digestion_and_absorption	http://www.genome.jp/kegg-bin/show_pathway?hsa04974+1303+85301+1285+1294	4	90	53	7257	0.00407587	0.16718	2.38978	0.0754717	COL12A1//COL27A1//COL4A3//COL7A1
hsa04145	Phagosome	http://www.genome.jp/kegg-bin/show_pathway?hsa04145+715+821+4973+83547+7059	5	152	53	7257	0.00482249	0.16718	2.31673	0.0943396	C1R//CANX//OLR1//RILP//THBS3
hsa00020	Citrate_cycle_(TCA_cycle)	http://www.genome.jp/kegg-bin/show_pathway?hsa00020+55753+5091	2	30	53	7257	0.019979	0.352934	1.69943	0.0377358	OGDHL//PC
hsa04146	Peroxisome	http://www.genome.jp/kegg-bin/show_pathway?hsa04146+215+54677+373156	3	83	53	7257	0.0224233	0.352934	1.6493	0.0566038	ABCD1//CROT//GSTK1
hsa05222	Small_cell_lung_cancer	http://www.genome.jp/kegg-bin/show_pathway?hsa05222+1285+3913+5915	3	84	53	7257	0.0231361	0.352934	1.63571	0.0566038	COL4A3//LAMB2//RARB
hsa05200	Pathways_in_cancer	http://www.genome.jp/kegg-bin/show_pathway?hsa05200+623+1050+1285+3913+10161+5915+80326	7	395	53	7257	0.0237552	0.352934	1.62424	0.132075	BDKRB1//CEBPA//COL4A3//LAMB2//LPAR6//RARB//WNT10A
hsa04151	PI3K-Akt_signaling_pathway	http://www.genome.jp/kegg-bin/show_pathway?hsa04151+284+1285+1942+3913+10161+7059	6	342	53	7257	0.037295	0.484835	1.42835	0.113208	ANGPT1//COL4A3//EFNA1//LAMB2//LPAR6//THBS3
hsa03320	PPAR_signaling_pathway	http://www.genome.jp/kegg-bin/show_pathway?hsa03320+4973+729359	2	72	53	7257	0.096843	0.714521	1.01393	0.0377358	OLR1//PLIN4
